# Supplementary material for: Dye-functionalized metal–organic frameworks with the uniform dispersion of MnO2 nanosheets for visualized fluorescence detection of alanine aminotransferase
Source: Royal Society of Chemistry journal article supplement (doi:10.1039/d1nr05376k), 2021-01-01
Supplement: d1nr05376k1.pdf [file d1nr05376k1.pdf]

## Supporting Information

### **Dye-functionalized Metal-Organic Frameworks with the Uniform Dispersion of MnO<sub>2</sub> Nanosheets for Visualized Fluorescence Detection of Alanine Aminotransferase**

Haifeng Sha<sup>†</sup>, Bing Yan<sup>\*,†,‡</sup>

<sup>†</sup>School of Chemical Science and Engineering, Tongji University, Siping Road 1239, Shanghai 200092, China.

<sup>‡</sup>School of Materials Science and Engineering, Liaocheng University, Liaocheng 252059, China

---

\* Corresponding author.

E-mail address: [byan@tongji.edu.cn](mailto:byan@tongji.edu.cn).

## 1. Experimental Section

**Preparation of ZIF-8.** ZIF-8 nanocrystals were synthesized according to reporting literature.<sup>42</sup> Briefly, a solution of  $\text{Zn}(\text{NO}_3)_2 \cdot 6\text{H}_2\text{O}$  (1.173 g) in 80 mL methanol was added into a solution of 2-methylimidazole (2.595 g) in 80 mL methanol under stirring with a magnetic bar. After keeping at room temperature for 1 h, ZIF-8 was formed, and then separated by centrifugation at 7000 rpm for 5 min and washed with methanol three times. The collected white powder was dried in the oven at 60 °C overnight.

**Preparation of  $\text{MnO}_2$  nanosheets.**  $\text{MnO}_2$  nanosheets were synthesized according to reporting literature with a little modification.<sup>43</sup> 2-Methylimidazole (0.03 g) and  $\text{KMnO}_4$  (0.02 g) were dissolved in 30 ml deionized water in a flask (100 ml). With continuous magnetic stirring in an ice bath, the mixture was allowed to react for 1 h. The black product was collected by centrifugation (6 min at 5000 rpm) and washed thoroughly using deionized water. The obtained  $\text{MnO}_2$  powders were dried at 80 °C for 12 h before further experiment.

## 2. Supporting Figures and Tables

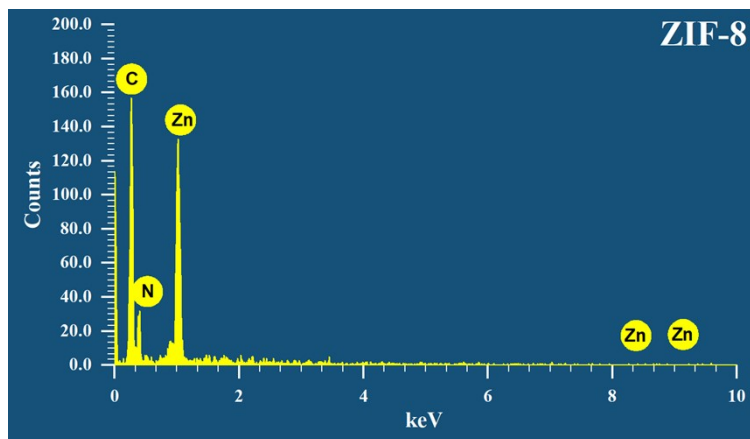

Fig. S1. EDX image of ZIF-8.

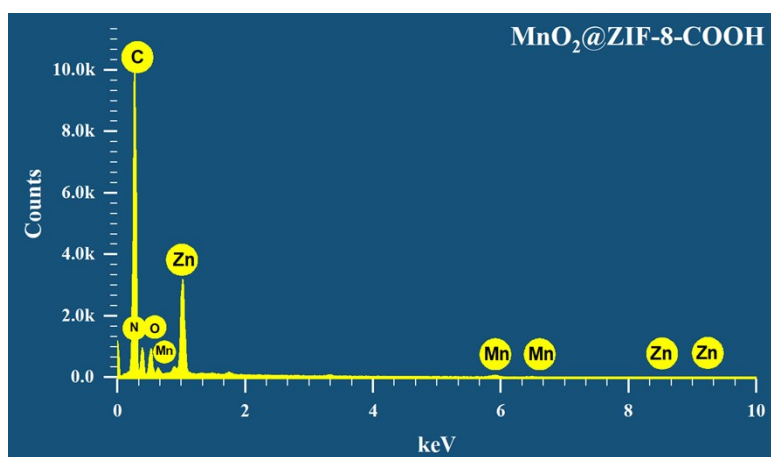

Fig. S2. EDX image of MnO<sub>2</sub>@ZIF-8-COOH.

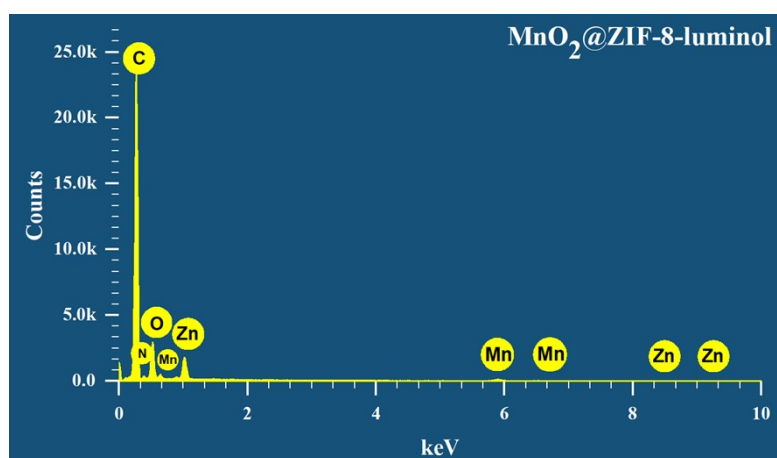

Fig. S3. EDX image of MnO<sub>2</sub>@ZIF-8-luminol.

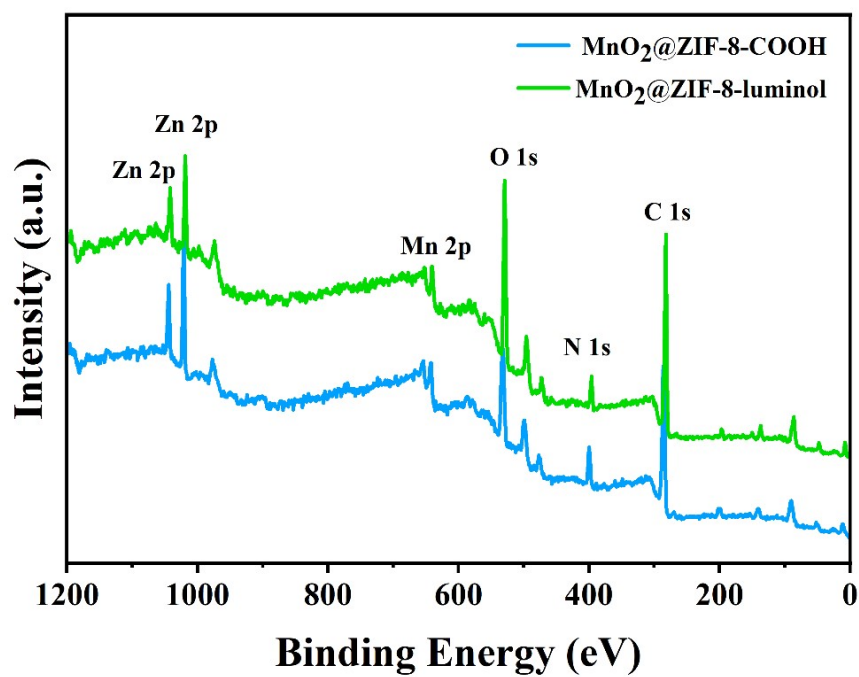

Fig. S4. XPS spectra of  $\text{MnO}_2@\text{ZIF-8-COOH}$  and  $\text{MnO}_2@\text{ZIF-8-luminol}$ .

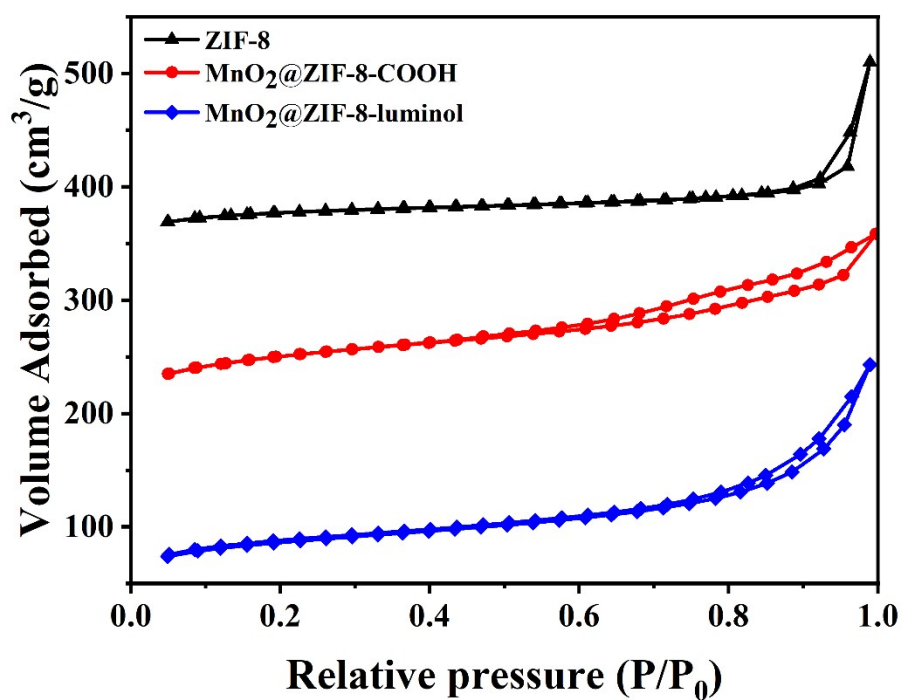

Fig. S5.  $\text{N}_2$  adsorption/desorption isotherms of ZIF-8,  $\text{MnO}_2@\text{ZIF-8-COOH}$ , and  $\text{MnO}_2@\text{ZIF-8-luminol}$ .

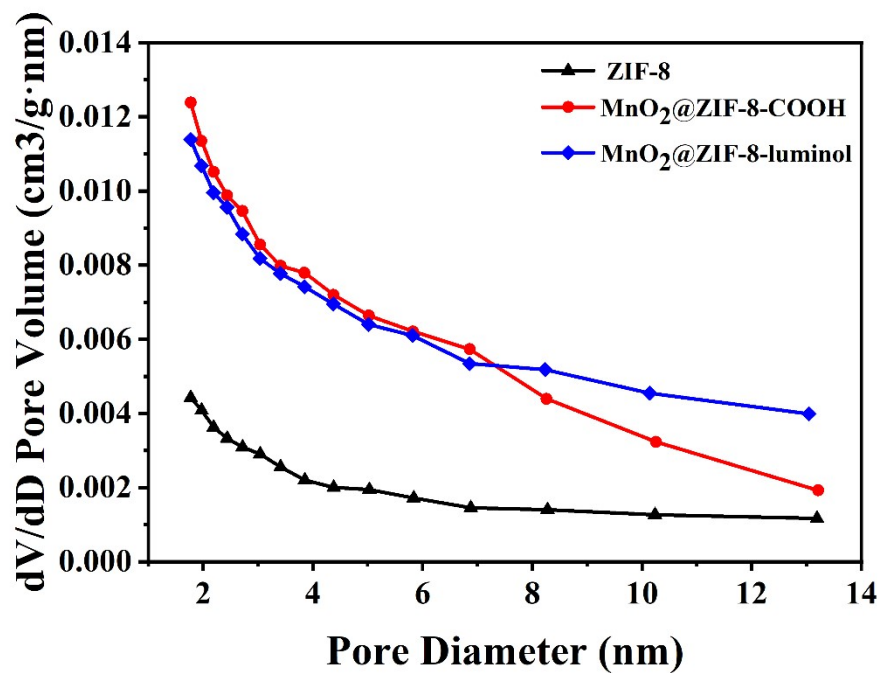

Fig. S6. Pore size distributions of ZIF-8, MnO<sub>2</sub>@ZIF-8-COOH, and MnO<sub>2</sub>@ZIF-8-luminol.

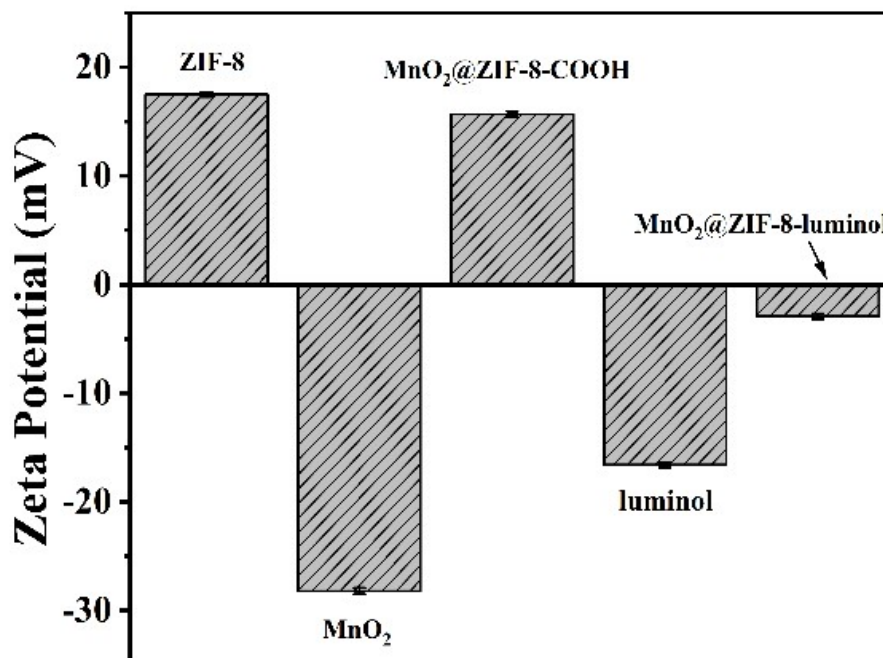

Fig. S7. Variation of  $\zeta$  potentials of ZIF-8, MnO<sub>2</sub>, luminol, MnO<sub>2</sub>@ZIF-8-COOH, and MnO<sub>2</sub>@ZIF-8-luminol.

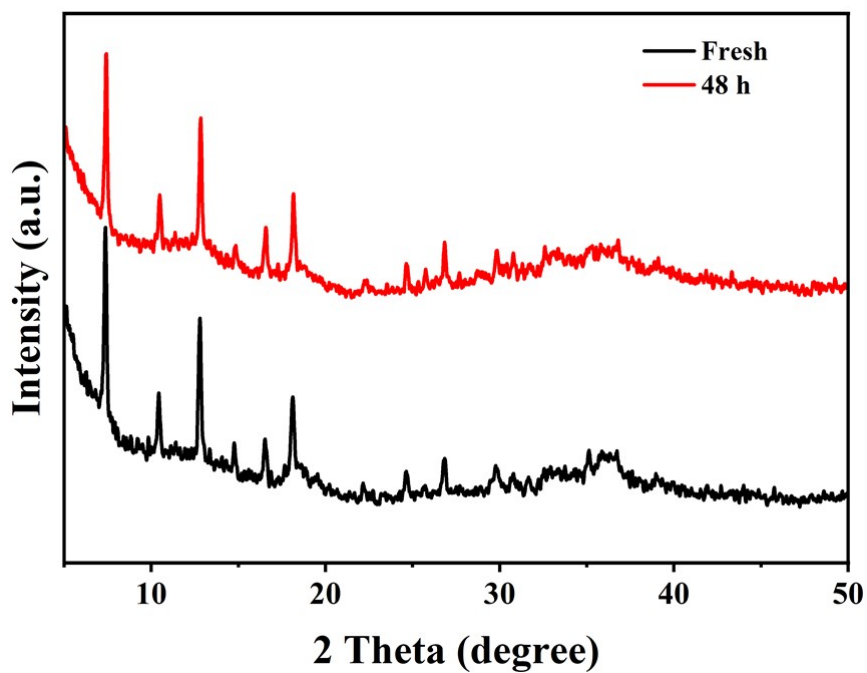

**Fig. S8.** PXRD patterns of  $\text{MnO}_2@ZIF-8$ -luminol before and after soaking in water for 48 h.

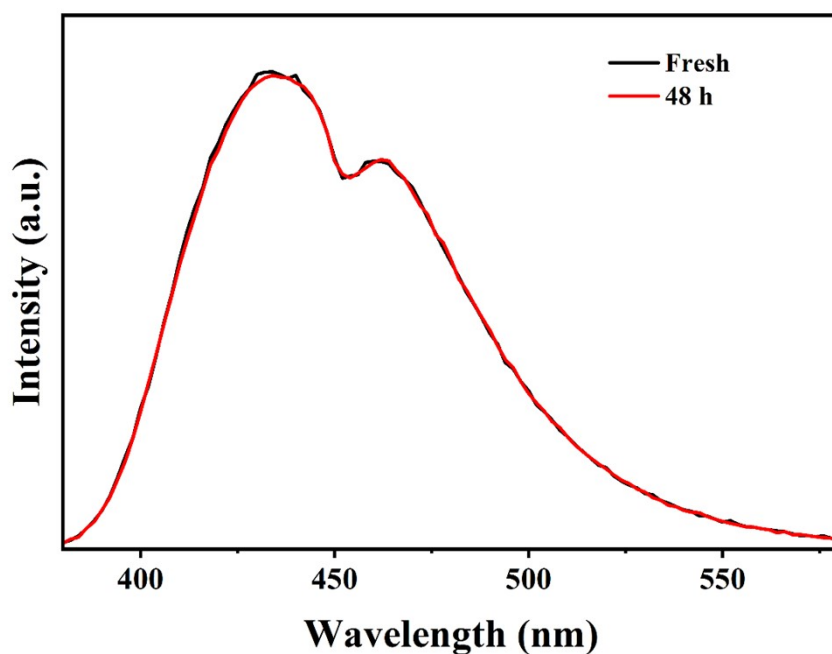

**Fig. S9.** Emission spectra of  $\text{MnO}_2@ZIF-8$ -luminol before and after soaking in water for 48 h ( $\lambda_{\text{exc}} = 365$  nm).

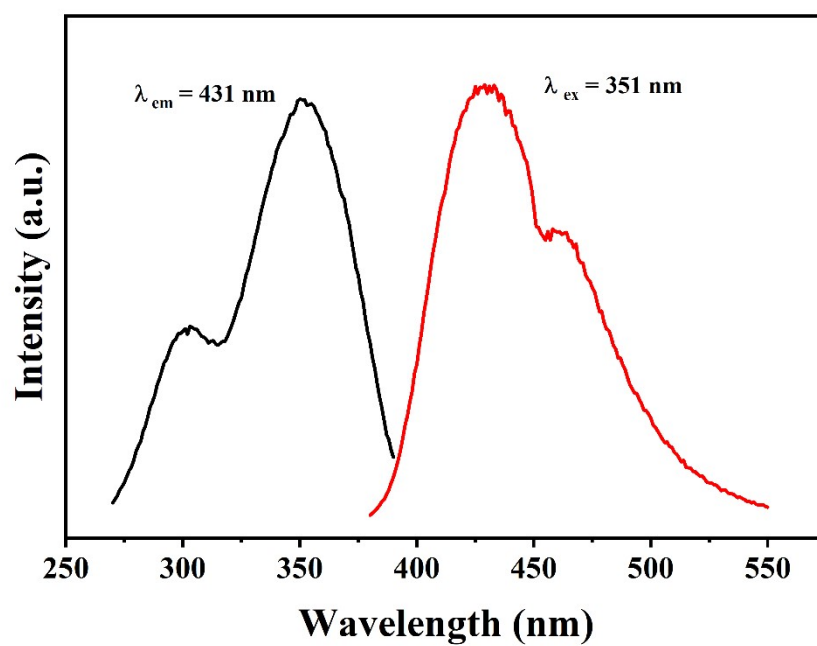

Fig. S10. Excitation and emission spectra of luminol.

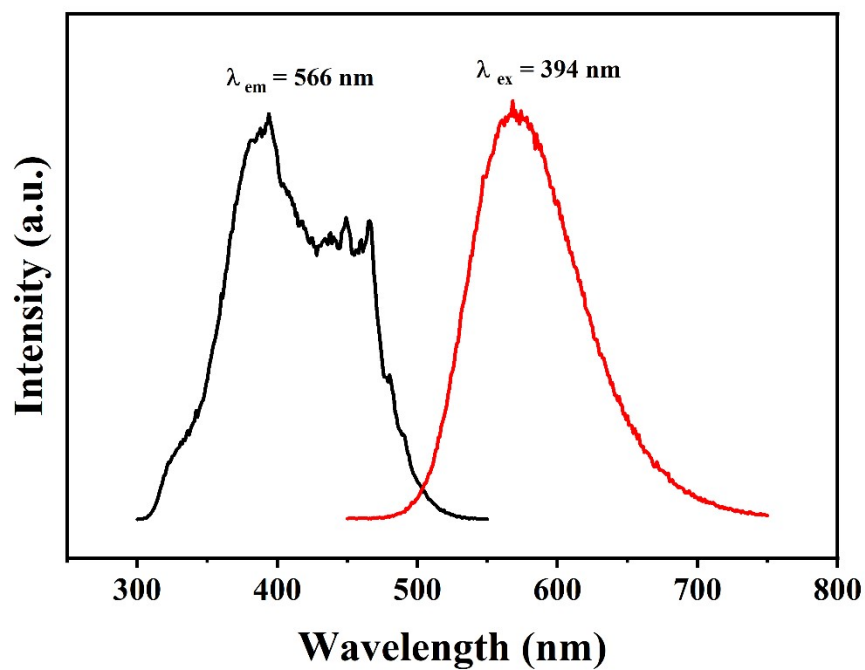

Fig. S11. Excitation and emission spectra of OPD in the presence of MnO<sub>2</sub>.

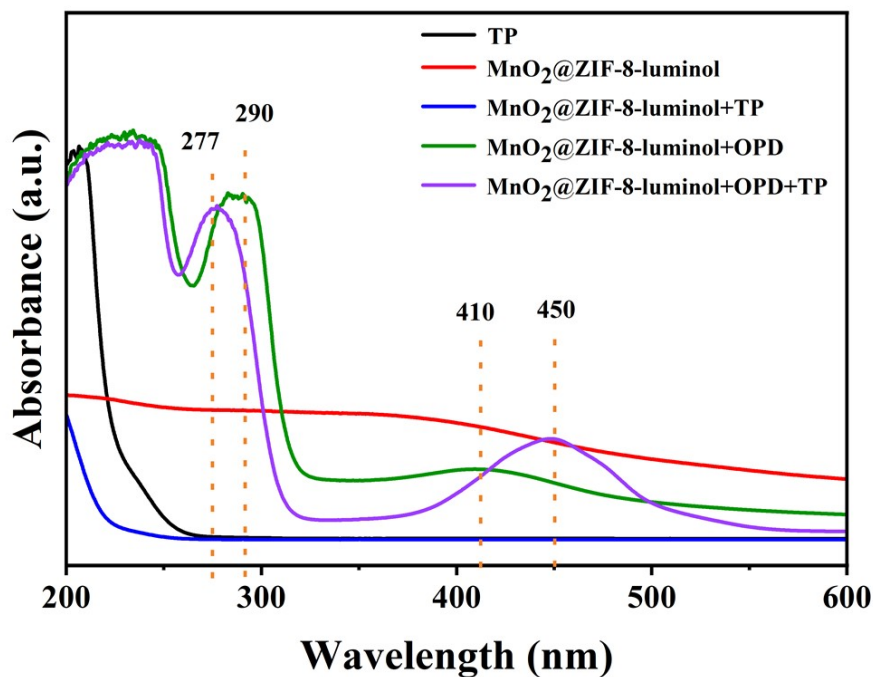

**Fig. S12.** The UV-vis absorption spectra of TP, **MnO<sub>2</sub>@ZIF-8-luminol** without and with TP, and **MnO<sub>2</sub>@ZIF-8-luminol** containing OPD in the absence and presence of TP.

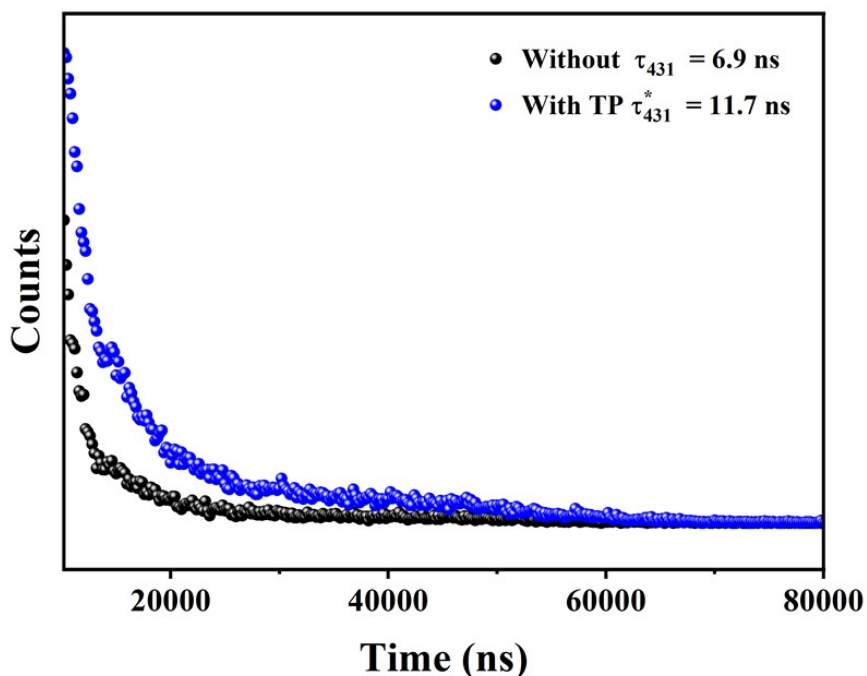

**Fig. S13.** Lifetime decay curve of **MnO<sub>2</sub>@ZIF-8-luminol** containing OPD in the presence of 0.2 mg mL<sup>-1</sup> TP (ex = 351 nm, em = 431 nm). = 615 nm).



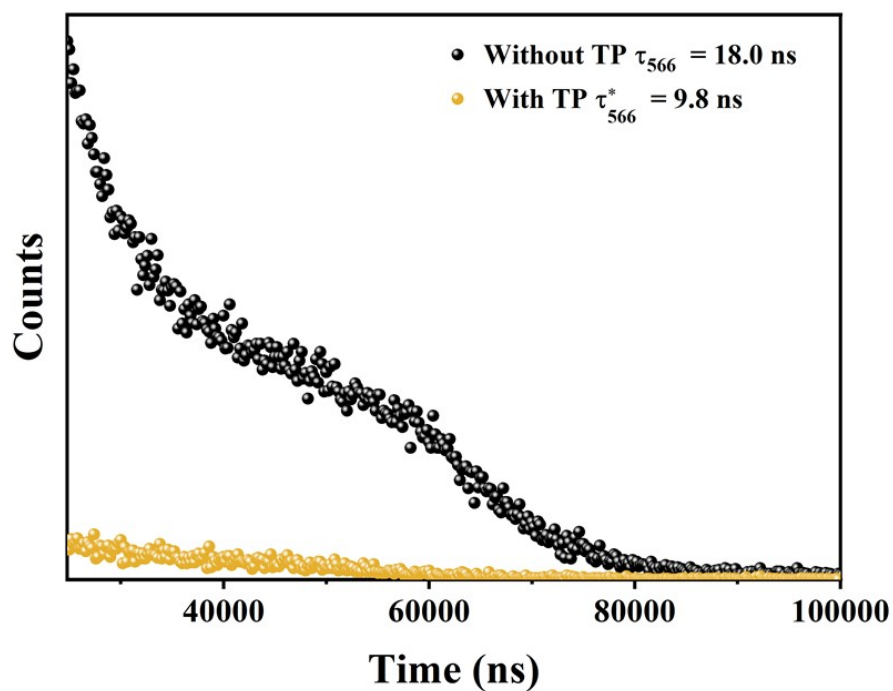

**Fig. S14.** Lifetime decay curve of **MnO<sub>2</sub>@ZIF-8-luminol** containing OPD in the presence of 0.2 mg mL<sup>-1</sup> TP ( $\lambda_{\text{ex}} = 394$  nm,  $\lambda_{\text{em}} = 566$  nm).

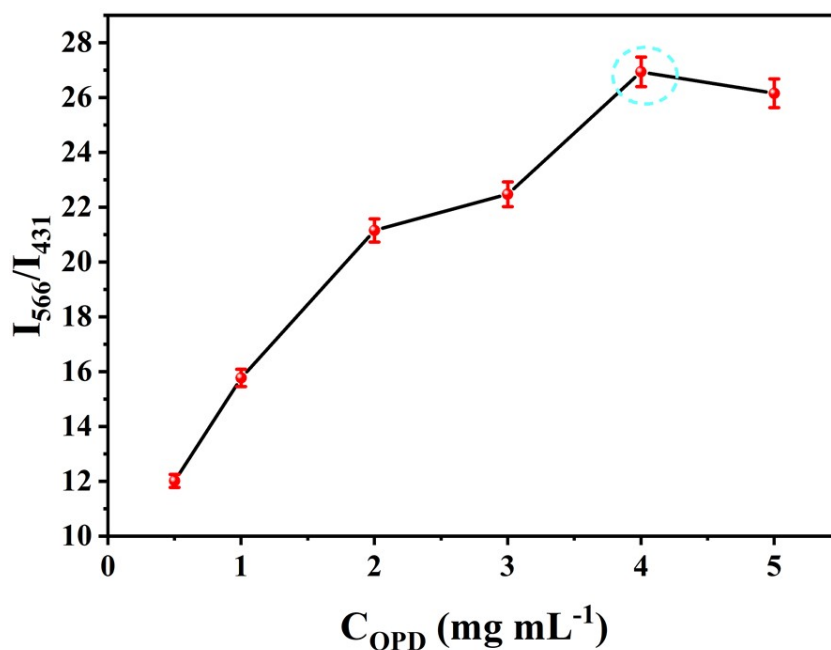

**Fig. S15.** Effect of various concentration of OPD on the values of  $I_{566}/I_{431}$  in aqueous solution of **MnO<sub>2</sub>@ZIF-8-luminol** ( $\lambda_{\text{ex}} = 365$  nm).

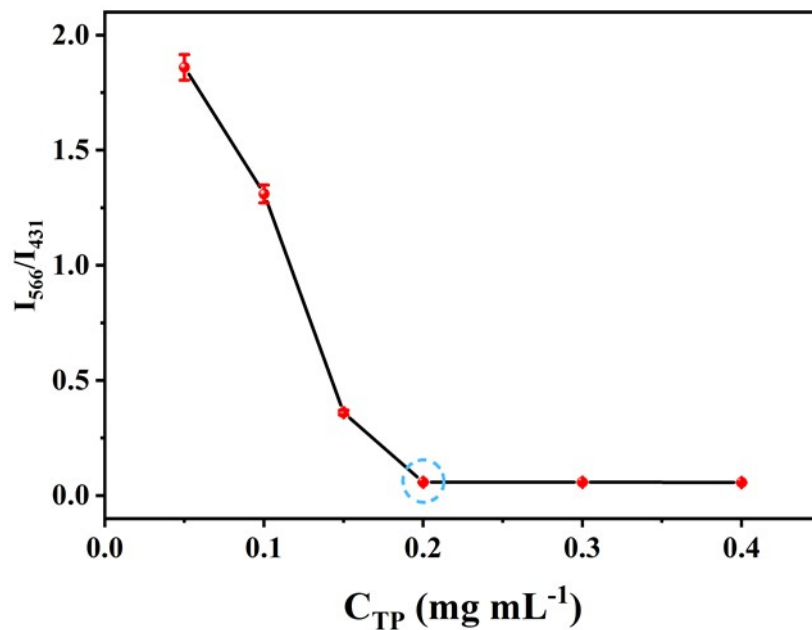

**Fig. S16.** Effect of various concentration of TP on the values of  $I_{566}/I_{431}$  of the sensor with 1500 U L<sup>-1</sup> ALT ( $\lambda_{ex} = 365$  nm).

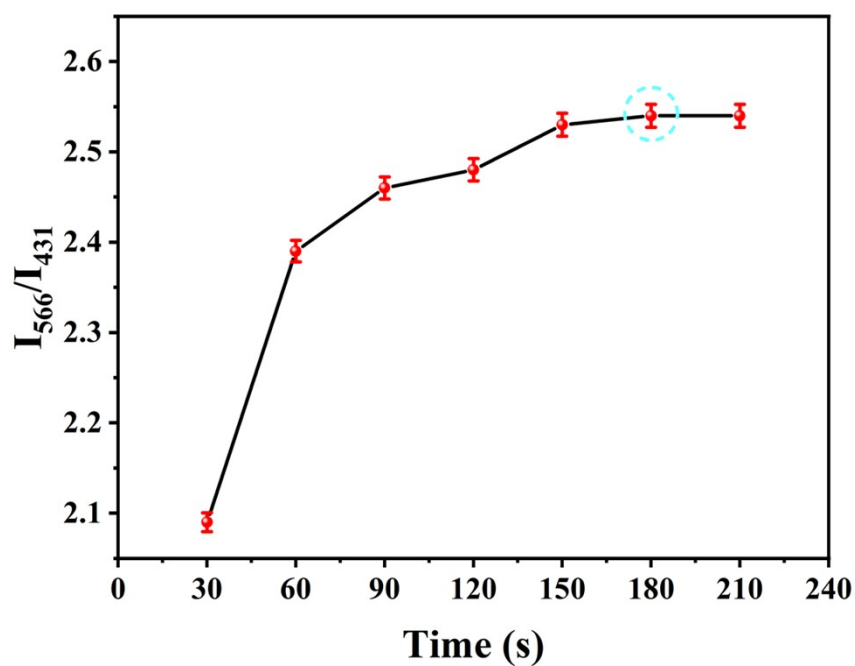

**Fig. S17.** Effect of reaction time between ALT (1500 U L<sup>-1</sup>) and TP on the values of  $I_{566}/I_{431}$  of the sensor ( $\lambda_{ex} = 365$  nm).

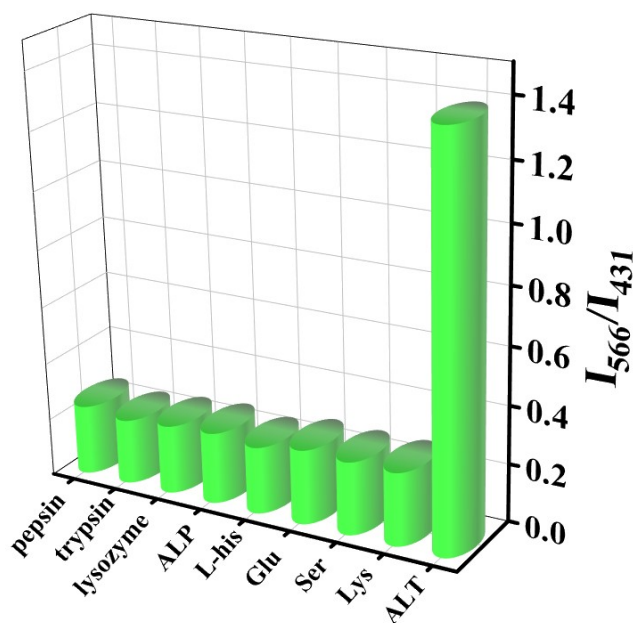

**Fig. S18.** Selectivity experiments of different substances, including pepsin, trypsin, lysozyme, ALP, L-his, Glu, Ser, Lys ( $1.0 \text{ mg mL}^{-1}$ ), and ALT ( $1000 \text{ U L}^{-1}$ ) ( $\lambda_{\text{ex}} = 365 \text{ nm}$ ).

**Table S1.** Analysis report of the energy dispersive X-ray analysis spectroscopy (EDS) of ZIF-8,  $\text{MnO}_2@\text{ZIF-8-COOH}$  and  $\text{MnO}_2@\text{ZIF-8-luminol}$ .

| Material                            | Element | Weight % |
|-------------------------------------|---------|----------|
| ZIF-8                               | C       | 45.83    |
|                                     | N       | 22.95    |
|                                     | Zn      | 31.22    |
| $\text{MnO}_2@\text{ZIF-8-COOH}$    | C       | 54.02    |
|                                     | N       | 16.82    |
|                                     | O       | 6.42     |
|                                     | Mn      | 4.33     |
|                                     | Zn      | 18.41    |
| $\text{MnO}_2@\text{ZIF-8-luminol}$ | C       | 69.10    |
|                                     | N       | 4.21     |
|                                     | O       | 13.79    |
|                                     | Mn      | 5.61     |
|                                     | Zn      | 7.29     |

**Table S2.** Comparison of various detection method for ALT detection.

| <b>Detection method</b> | <b>Linear range<br/>(U L<sup>-1</sup>)</b> | <b>Detection limit<br/>(U L<sup>-1</sup>)</b> | <b>Refs</b> |
|-------------------------|--------------------------------------------|-----------------------------------------------|-------------|
| Electrochemistry        | 40–1990                                    | 20.6                                          | [9]         |
| Electrochemistry        | 0–80                                       | 2.18                                          | [10]        |
| Electrochemistry        | 10–1000                                    | 3.29                                          | [11]        |
| Paper-based analysis    | 5.38–86.1                                  | /                                             | [12]        |
| Fluorescence            | 1–1500                                     | 0.5                                           | This work   |

**Table S3.** The results of recovery experiments.

| <b>Samples</b> | <b>Spiked<br/>(U L<sup>-1</sup>)</b> | <b>Measured<br/>(U L<sup>-1</sup>)</b> | <b>Recovery<br/>(%)</b> | <b>RSD<br/>(%)</b> |
|----------------|--------------------------------------|----------------------------------------|-------------------------|--------------------|
| 1              | 10                                   | 10.02                                  | 100.2                   | 2.56               |
| 2              | 100                                  | 98.58                                  | 98.6                    | 3.14               |
| 3              | 500                                  | 483.5                                  | 96.7                    | 4.37               |
| 4              | 1000                                 | 1053                                   | 105.3                   | 5.02               |
